# Supplementary material for: Effect of thermal cycling on the mechanical properties of conventional, milled, and 3D-printed base resin materials: a comparative in vitro study
Source: PeerJ. 2025 Mar 17;13:e19141. doi: 10.7717/peerj.19141 (PMC11925046; doi:10.7717/peerj.19141)
Supplement: Supplemental Information 1 — The raw data shows the flexural strength, Vickers hardness and impact strength of conventional, milled and 3D printed groups. [file peerj-13-19141-s001.xlsx]

## Sheet: Sheet1
flexural strength（MPa）
	conventional	Milled	3D-printed
before thermal cycling	52.36	87.75	90.69
before thermal cycling	49.19	74.05	99.75
before thermal cycling	38.14	88.61	90.48
before thermal cycling	52.42	72.36	84.17
before thermal cycling	53.22	70.7	94.48
before thermal cycling	49.55	89.49	79.89
before thermal cycling	39.54	59.57	68.13
before thermal cycling	33.22	83.49	92.03
after thermal cycling	38.2	85.68	18.47
after thermal cycling	35.54	89.85	52.41
after thermal cycling	40.15	88.46	13.47
after thermal cycling	39.84	84.4	33.63
after thermal cycling	37.15	88.31	27.03
after thermal cycling	40.12	93.22	45.67
after thermal cycling	35.18	89	31.31
after thermal cycling	34.93	86.55	77.09
Vickers hardness（HV）
	conventional	Milled	3D-printed
before thermal cycling	14.5	22.6	17.2
before thermal cycling	14.8	21.5	18.7
before thermal cycling	15.2	20.1	16.3
before thermal cycling	14.4	19.4	15.3
before thermal cycling	14.9	19	18.5
before thermal cycling	15.4	20.2	17.9
before thermal cycling	14.7	20	17.8
before thermal cycling	16	19.7	20.5
after thermal cycling	17.4	18.4	16.1
after thermal cycling	17.5	18.9	15.9
after thermal cycling	16	19.6	16.3
after thermal cycling	17.5	19	15.3
after thermal cycling	18.6	19.2	14.4
after thermal cycling	16.2	19.2	18.2
after thermal cycling	16.9	18.9	12.8
after thermal cycling	16.4	18.9	16.4
impact strength（KJ/m2）
	conventional	milled	3D-printed
before thermal cycling	3.6	12.7	4.3
before thermal cycling	6.1	15.3	4.5
before thermal cycling	5.7	8.9	5.4
before thermal cycling	7.4	10.2	5.6
before thermal cycling	5.4	12.8	4.3
before thermal cycling	8.4	9.7	5
before thermal cycling	7.3	8.4	4.5
before thermal cycling	9.5	10.5	3
after thermal cycling	11.7	6.2	2.3
after thermal cycling	11.6	9	0.9
after thermal cycling	4.6	11.2	2.1
after thermal cycling	10.1	12.6	4.1
after thermal cycling	5.8	13	4.9
after thermal cycling	4.6	6.3	1.3
after thermal cycling	8.9	11.3	0.1
after thermal cycling	9.7	7.5	3.7
